# Supplementary material for: Dual-responsive deformation of a crosslinked liquid crystal polymer film with complex molecular alignment
Source: Royal Society of Chemistry journal article supplement (doi:10.1039/c7sm01291h), 2017-01-01
Supplement: c7sm01291h4.pdf [file c7sm01291h4.pdf]

## Electronic Supplementary Information

### **Dual-responsive deformation of crosslinked liquid crystal polymer film with complex molecular alignment**

Quan Liu,<sup>a</sup> Yuanyuan Zhan,<sup>a</sup> Jia Wei,<sup>a</sup> Wei Ji,<sup>b</sup> Wei Hu<sup>b</sup> and Yanlei Yu<sup>a\*</sup>

---

*a. Department of Materials Science, State Key Laboratory of Molecular Engineering of Polymers, Fudan University, 220 Handan Road, Shanghai, 200433, China. E-mail: [ylyu@fudan.edu.cn](mailto:ylyu@fudan.edu.cn)*

*b. National Laboratory of Solid State Microstructures, College of Engineering and Applied Sciences, and Collaborative Innovation Center of Advanced Microstructures, Nanjing University, Nanjing, 210093, China.*

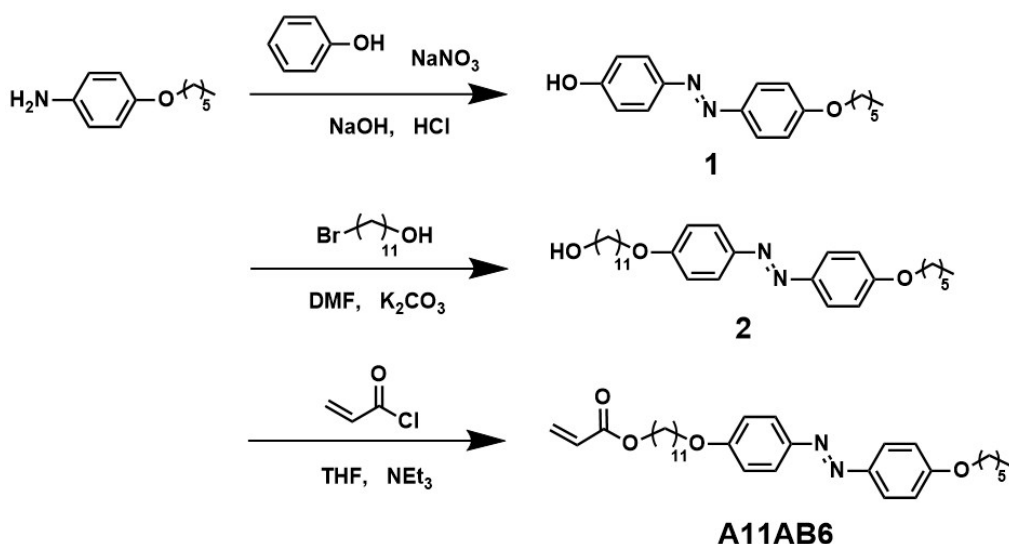

**Scheme S1.** Synthetic route of liquid crystal monomer A11AB6.

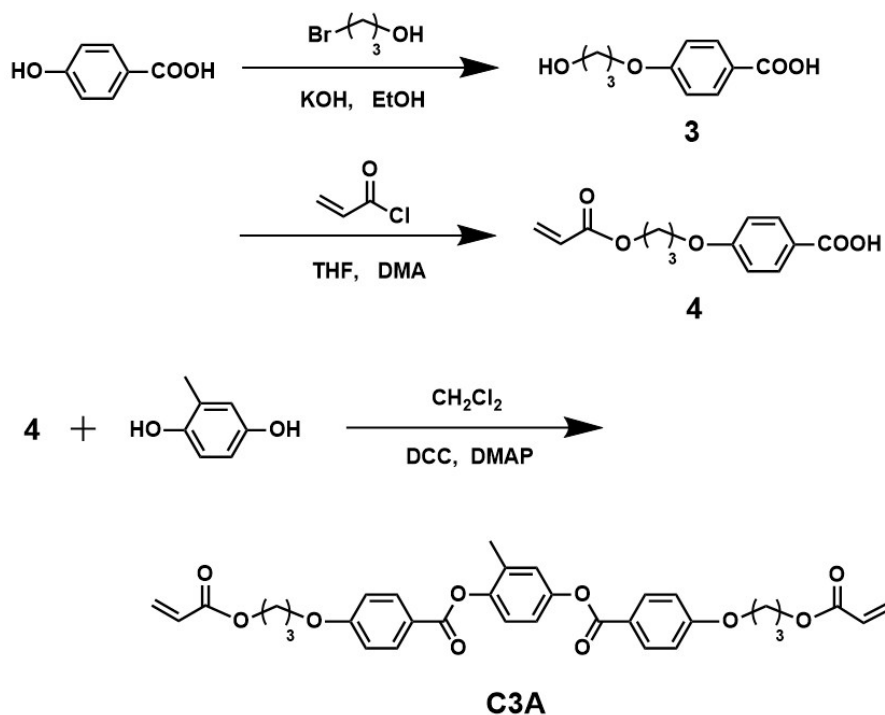

**Scheme S2.** Synthetic route of crosslinker C3A.

**Table S1.** Phase transition temperatures of A11AB6, C3A and the mixture of them.

| Liquid Crystals            | Phase Transition Temperatures                                                            |
|----------------------------|------------------------------------------------------------------------------------------|
| A11AB6                     | K <sup>a</sup> 68 S <sup>b</sup> 85 N <sup>c</sup> 96 I <sup>d</sup><br>K 56 S 75 N 94 I |
| C3A                        | K 76 N 125 I<br>K 73 N 129 I                                                             |
| A11AB6/C3A (mol/mol = 6/4) | K 62 S 82 N 93 I<br>K 58 S 67 N 92 I                                                     |

<sup>a</sup>K: Crystal phase; <sup>b</sup>S: Smectic phase; <sup>c</sup>N: Nematic phase; <sup>d</sup>I: Isotropic phase.

### Heating

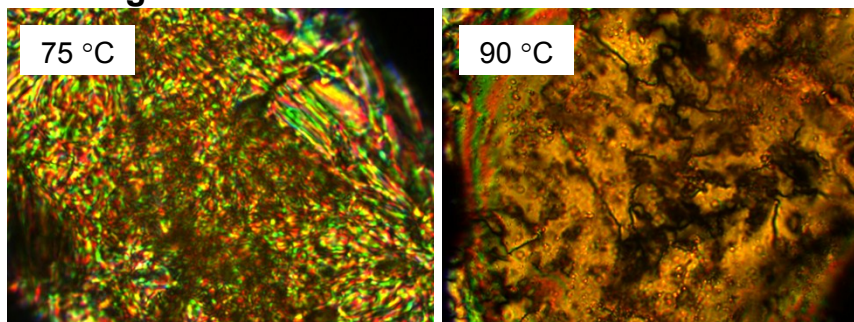

### Cooling

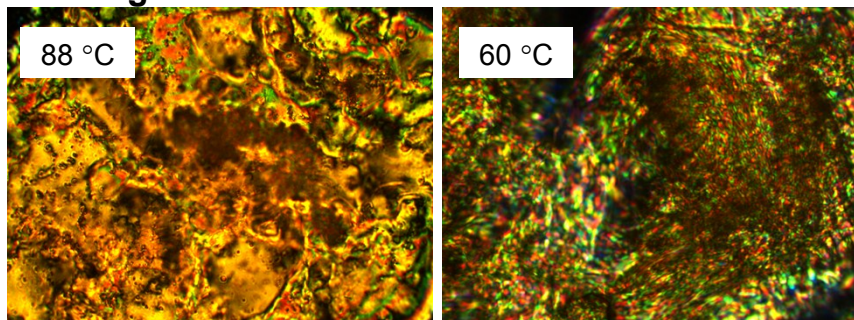

**Figure S1.** POM pictures of the mixture in heating and cooling.

**Movie S1.** UV-induced deformation and recovery of the CLCP film with complex molecular alignment. The SD1 side is exposed to the light source.

**Movie S2.** Blue light-induced deformation and over-recovery of the CLCP film with complex molecular alignment. The SD1 side is exposed to the light source.

**Movie S3.** Heat-induced deformation and over-recovery of the CLCP film with complex molecular alignment. The PI side is in contact with the hot stage.
